# Supplementary material
Source: publisher figshare collection journal article supplement (https://gsajournals.figshare.com/articles/dataset/_/14673441)
Supplement: Supplementary file 1 [file 1]

**Table S1:** Primer sequences used for CRISPR/Cas9 tagging *unc-104*, *unc-18*, and *unc-52* with auxin inducible degron tag

\*All DNA sequences are presented in the 5' to 3' direction

|                                                               |                                                                                                                                                                                                                                                                                                                                                                                     |
|---------------------------------------------------------------|-------------------------------------------------------------------------------------------------------------------------------------------------------------------------------------------------------------------------------------------------------------------------------------------------------------------------------------------------------------------------------------|
| <i>unc-104</i> repair template oligo                          | AGATGTATGATTGGCTGTACGCAATCAATCCATTGATGGCC<br>GGCCAGATGAAGCTTCACGGAAACCAGAACGGAACACTACTC<br>TTAAGTCCCCAACCTCTTCTTCCTCCATCGCAGCATCCGGT<br>GGATCGGGTTTCGATGCCTAAAGATCCAGCCAAACCTCCGG<br>CCAAGGCACAAGTTGTGGGATGGCCACCGGTGAGATCATA<br>CCGGAAAAATGTTATGGTTTCTTGTCAAAAATCAAGTGGTG<br>GCCCCGAGGCGGCGGCGTTCGTGAAGTGAAGTATCTAATT<br>TTCTTTGCTTTTTTATCTGTTTTTCTTTCTGTGATTATTTCACT<br>TCCTTCCAC |
| <i>unc-104</i> sgRNA-1                                        | ttcatttGTCCAGCCATCAA                                                                                                                                                                                                                                                                                                                                                                |
| <i>unc-104</i> sgRNA-1                                        | TCACAGAAAGAAAAACAGAT                                                                                                                                                                                                                                                                                                                                                                |
| <i>unc-104</i> screening primer (reverse, flanking insertion) | GTTCAATTCCCCCAGGTATCCATAG                                                                                                                                                                                                                                                                                                                                                           |
| <i>unc-104</i> screening primer (reverse, inside insertion)   | TCCGGGCCACCACTTGATT                                                                                                                                                                                                                                                                                                                                                                 |
| <i>unc-104</i> screening primer (forward, inside insertion)   | ACTTACTGAGCTCTCAGTGGACAC                                                                                                                                                                                                                                                                                                                                                            |
| <i>unc-18</i> repair template oligo                           | TCCTGACCAACTTGCGTGACCTGAACAAACCGCGTGATATC<br>GGCAGTACCGGTAGCATGCCTAAAGATCCAGCCAAACCTC<br>CGGCCAAGGCACAAGTTGTGGGATGGCCACCGGTGAGAT<br>CATACCGGAAGAACGTGATGGTTTCCTGCCAAAAATCAAGC<br>GGTGGCCCGGAGGCGGCGGCGTTCGTGAAGTGACAGAGA<br>GCGGGGTACCGAAAAGAATCGACAATTGACGAAAC                                                                                                                     |
| <i>unc-18</i> sgRNA-1                                         | GCACTCTGT CATATGT CACG                                                                                                                                                                                                                                                                                                                                                              |
| <i>unc-18</i> sgRNA-1                                         | GTGACATATGACAGAGTGCG                                                                                                                                                                                                                                                                                                                                                                |
| <i>unc-18</i> screening primer (forward, flanking insertion)  | GGTGTACCTTCTCCGAAATGC                                                                                                                                                                                                                                                                                                                                                               |
| <i>unc-18</i> screening primer (reverse, inside insertion)    | GTTACATTATTTTTGGCCATGGGAAGAG                                                                                                                                                                                                                                                                                                                                                        |
| <i>unc-18</i> screening primer (forward, inside insertion)    | GCCAAGGCACAAGTTGTGGG                                                                                                                                                                                                                                                                                                                                                                |
| <i>unc-52</i> repair template oligo                           | TTTAAAACTGACCTACTGCTCATTTATACCCCCCGAGTACTA<br>GTTAGGGGGGATGCCTAAAGATCCAGCCAAACCTCCGGCC<br>AAGGCACAAGTTGTGGGATGGCCACCGGTGAGATCATACC<br>GGAAGAACGTGATGGTTTCCTGCCAAAAATCAAGCGGTGG<br>CCCGGAGGCGGCGGCGTTCGTGAAGGGCAGTACCGGTAG<br>CATGGCCTTCTCCCTTTTTTCTGTTGTTTCACTGACGGTCAT<br>CTACCGGTTGACCATCAAC                                                                                      |
| <i>unc-52</i> sgRNA-1                                         | CCCCCCTAACTAGTTGACGG                                                                                                                                                                                                                                                                                                                                                                |
| <i>unc-52</i> sgRNA-1                                         | GATGACCGTCAGTGAAACGA                                                                                                                                                                                                                                                                                                                                                                |
| <i>unc-52</i> screening primer (forward, inside insertion)    | CAACCTTAGCTGTATGCCTTCCTTC                                                                                                                                                                                                                                                                                                                                                           |
| <i>unc-52</i> screening primer (reverse, flanking insertion)  | CGCCTCTGTCTAGCAACCTTCTATC                                                                                                                                                                                                                                                                                                                                                           |
| <i>unc-52</i> screening primer (reverse, inside insertion)    | CCAAGGCACAAGTTGTGGGAT                                                                                                                                                                                                                                                                                                                                                               |
